# Supplementary material for: Effects of spermine on ileal physical barrier, antioxidant capacity, metabolic profile and large intestinal bacteria in piglets
Source: Royal Society of Chemistry journal article supplement (doi:10.1039/c9ra10406b), 2020-01-01
Supplement: c9ra10406b1.pdf [file c9ra10406b1.pdf]

## Supplementary material

### Effects of spermine on ileal physical barrier, antioxidant capacity, metabolic profile and large intestinal bacteria in piglets

Guangmang Liu, <sup>\*a,b,c</sup> Weiwei Mo, <sup>a,b,c</sup> Wei Cao, <sup>a,b,c</sup> Xianjian Wu, <sup>a,b,c</sup> Gang Jia, <sup>a,b,c</sup> Hua Zhao, <sup>a,b,c</sup> Xiaoling Chen, <sup>a,b,c</sup> Caimei Wu, <sup>a,b,c</sup> and Jing Wang <sup>d</sup>

<sup>a</sup> Institute of Animal Nutrition, Sichuan Agricultural University, Chengdu, Sichuan, China

<sup>b</sup> Key Laboratory for Animal Disease-Resistance Nutrition, Ministry of Education, Chengdu, Sichuan, China

<sup>c</sup> Key laboratory of Animal Disease-resistant Nutrition and Feed, Ministry of Agriculture and Rural Affairs, Chengdu, Sichuan, China

<sup>d</sup> Maize Research Institute, Sichuan Agricultural University, Chengdu, Sichuan, China

**Table S1** Composition and nutrient level of basal formula milk powder (87.5%

DM basis)

| Ingredients                              | %     |
|------------------------------------------|-------|
| Whole-milk powder (24% CP)               | 58.00 |
| Whey protein concentrate (34% CP)        | 25.00 |
| Casein                                   | 5.70  |
| Coconut oil                              | 10.00 |
| CaH <sub>2</sub> PO <sub>4</sub>         | 0.10  |
| Choline chloride (50%)                   | 0.10  |
| Vitamin premix <sup>a</sup>              | 0.10  |
| Mineral premix                           | 0.50  |
| L-Arg (98.5%)                            | 0.06  |
| DL-Met (98.5%)                           | 0.06  |
| L-Lys.HCl (78.5%)                        | 0.30  |
| L-Thr (98%)                              | 0.03  |
| L-Trp (98%)                              | 0.05  |
| Total                                    | 100   |
| Nutrient content                         |       |
| Digestible energy (kJ kg <sup>-1</sup> ) | 18390 |
| Crude protein (%)                        | 25.30 |
| Ca (%)                                   | 1.02  |

|                    |      |
|--------------------|------|
| Total P (%)        | 0.81 |
| Available P (%)    | 0.67 |
| Digestible Lys (%) | 1.93 |
| Digestible Met (%) | 0.63 |
| Digestible Arg (%) | 0.86 |

---

<sup>a</sup> Vitamin premix provided per kg powder diet: vitamin A, 0.94 mg; vitamin D3, 0.01 mg; vitamin E, 20 mg; vitamin K3, 1 mg; vitamin B12, 0.04 mg; riboflavin, 5 mg; niacin, 20 mg; pantothenic acid, 15 mg; folic acid, 1.5 mg; thiamin, 1.5 mg; pyridoxine, 2 mg; biotin, 0.1 mg. Mineral premix provided per kg powder diet: Zn, 90 mg; Mn, 4.0 mg; Fe, 90 mg; Cu, 6.0 mg; I, 0.2 mg; Se, 0.3 mg.

**Table S2** Primers sequences of target and reference genes selected for analysis by real-time PCR

| Genes    | Primer  | Sequence (5'-3')         | Size, bp | Temperature (°C) | Accession No.  |
|----------|---------|--------------------------|----------|------------------|----------------|
| β-actin  | Forward | TGCGGGACATCAAGGAGAA      | 58       | 58               | DQ452569.1     |
|          | Reverse | GCCATCTCCTGCTCGAAGTC     |          |                  |                |
| SOD1     | Forward | GATCAAGAGAGGCACGTTGGA    | 62       | 58               | AF396674.1     |
|          | Reverse | GTGGCCACACCATCTTTGC      |          |                  |                |
| GPx1     | Forward | GGCGGCGGGTTCTGA          | 55       | 58               | NM_214201.1    |
|          | Reverse | CGCCATTCACCTCACACTTCT    |          |                  |                |
| CAT      | Forward | GGACGTGCAGCGCTTCA        | 52       | 58               | NM_214         |
|          | Reverse | CCGCACCTGGGTGACATTA      |          |                  |                |
| GR       | Forward | CAGTAGAGGTCAACGGGAAGAAGT | 59       | 58               | AY368271.1     |
|          | Reverse | GCCGCCTGTGGCAATC         |          |                  |                |
| GST      | Forward | TCCCCACGGTGAAGAAGTTT     | 57       | 58               | Z69586.1       |
|          | Reverse | CGTCAGTGGGAGGCTTCCT      |          |                  |                |
| Nrf2     | Forward | GCCCCTGGAAGCGTTAAAC      | 67       | 58               | XM_003133500.5 |
|          | Reverse | GGACTGTATCCCCAGAAGGTTGT  |          |                  |                |
| Keap1    | Forward | ACGACGTGGAGACAGAAACGT    | 56       | 58               | NM_001114671.1 |
|          | Reverse | GCTTCGCCGATGCTTCA        |          |                  |                |
| ZO-1     | Forward | CCCAACCTCACAAATAGAAAGTGA | 70       | 58               | XM_013993251.1 |
|          | Reverse | GCGAATAATGCCAGAGCTACGT   |          |                  |                |
| ZO-2     | Forward | CGGGTGGTCATGGTTAACG      | 59       | 58               | NM_001206404.1 |
|          | Reverse | TGAACGGCAAAGGAATGGA      |          |                  |                |
| Occludin | Forward | CCTCAGGCAGCCTCATTACAG    | 61       | 58               | NM_001163647.2 |
|          | Reverse | GGGAGCCCGTTTTGAAGAC      |          |                  |                |

|                         |          |                                |     |    |                |
|-------------------------|----------|--------------------------------|-----|----|----------------|
| Claudin-1               | Forward  | GCTCCTGCCCCCGAAA               | 63  | 58 | NM_001244539.1 |
|                         | Reverse  | AAGGCGAAGGTTTTGGATAGG          |     |    |                |
| Claudin-2               | Forward  | TCCTCCCTGTTCTCCCTGATAG         | 59  | 58 | NM_001161638.1 |
|                         | Reverse  | CCTTGCAAGTGGGCAGGAA            |     |    |                |
| Claudin -3              | Forward  | TGGGAGGGCCTGTGGAT              | 64  | 58 | NM_001160075.1 |
|                         | Reverse  | CGTACACTTTGCACTGCATCTG         |     |    |                |
| Claudin-12              | Forward  | GGGCTGTCTGGGATGTTCA            | 57  | 58 | NM_001160079.1 |
|                         | Reverse  | GAGGCGATTCCACACAGGAA           |     |    |                |
| Claudin-14              | Forward  | GAAATAAATGCACCCGGATAATCT       | 92  | 58 | NM_001161642.1 |
|                         | Reverse  | CCGCGGGAGTCCTAATGA             |     |    |                |
| Claudin 15              | Forward  | TGCACGGGAACGTCATCA             | 63  | 58 | NM_001161643.1 |
|                         | Reverse  | CGGTGGCGCAGCTGTAC              |     |    |                |
| Claudin 16              | Forward  | TCCTGTTGGCTTGAATGG             | 57  | 58 | FJ873105.1     |
|                         | Reverse  | GAGGACAGCACCCAGCCAAA           |     |    |                |
| MLCK                    | Forward  | AAGGCCAACATCGTCATGGT           | 66  | 58 | XM_021070241.1 |
|                         | Reverse  | GTCAATGATGCGCTCGAACA           |     |    |                |
| Total bacteria          | Forward: | ACTCCTACGGGAGGCAGCAG           | 200 | 60 |                |
|                         | Reverse: | ATTACCGCGGCTGCTGG              |     |    |                |
| <i>Lactobacillus</i>    | Forward: | GAGGCAGCAGTAGGGAATCTTC         | 126 | 60 |                |
|                         | Reverse: | CAACAGTTACTCTGACACCCGTTCTTC    |     |    |                |
|                         | Probe    | AAGAAGGGTTTTCGGCTCGTAAACTCTGTT |     |    |                |
| <i>Bifidobacterium</i>  | Forward: | CGCGTCCGGTGTGAAAG              | 121 | 60 |                |
|                         | Reverse: | CTTCCCGATATCTACACATTCCA        |     |    |                |
|                         | Probe    | ATTCCACCGTTACACCGGGAA          |     |    |                |
| <i>Escherichia coli</i> | Forward: | CATGCCGCGTGTATGAAGAA           | 96  | 60 |                |
|                         | Reverse: | CGGGTAACGTCAATGAGCAAA          |     |    |                |

---

Probe AGGTATTAACCTTTACTCCCTTCCTC

---

SOD1 = superoxide dismutase 1; CAT = catalase; GP<sub>x</sub>1 = glutathione peroxidase 1; GR = glutathione reductase; GST = glutathione S-transferase; Nrf2 = nuclear erythroid 2-related factor 2; Keap1 = Kelch-like ECH-associated protein; ZO-1 = zonula occludens 1; ZO-2 = zonula occludens 2; MLCK = myosin light chain kinase
